# Supplementary material for: Luminescence photoswitching of Ho-doped Na0.5Bi2.5Nb2O9 ferroelectrics: the luminescence readout process
Source: Royal Society of Chemistry journal article supplement (doi:10.1039/c6tc04422k), 2016-11-25
Supplement: c6tc04422k1.pdf [file c6tc04422k1.pdf]

## Supporting Information

# Luminescence photoswitching of Ho-doped $\text{Na}_{0.5}\text{Bi}_{2.5}\text{Nb}_2\text{O}_9$ ferroelectrics: luminescence readout process

Qiwei Zhang,<sup>a</sup> Jian Liu,<sup>a</sup> Haiqin Sun,<sup>\*a</sup> Xusheng Wang,<sup>b</sup> Xihong Hao<sup>\*a</sup> and Shengli An<sup>a</sup>

<sup>a</sup> School of Materials and Metallurgy, Inner Mongolia University of Science and Technology, 7# Arerding Street, Kun District, Baotou 014010, China

<sup>b</sup> Functional Materials Research Laboratory, School of Materials Science and Engineering, Tongji University, 4800 Caoyang Road, Shanghai 201804, China

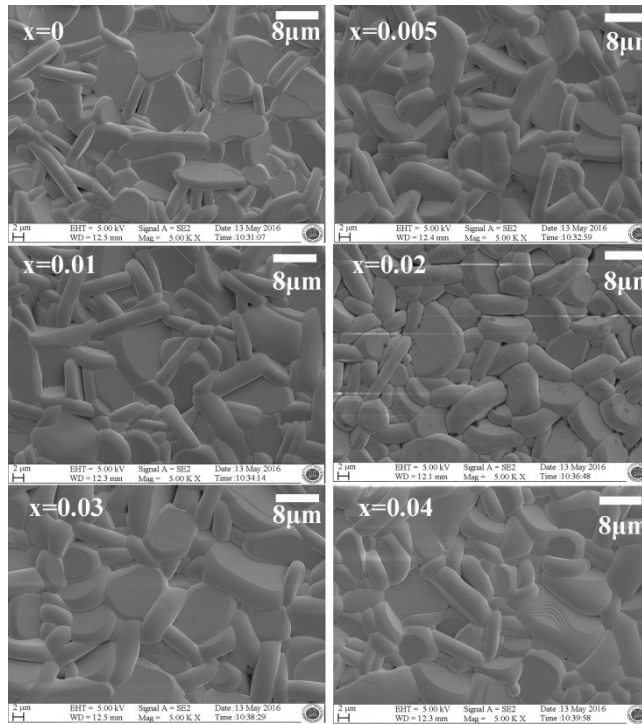

Fig. S1 SEM images of NBN:xHo ceramic samples

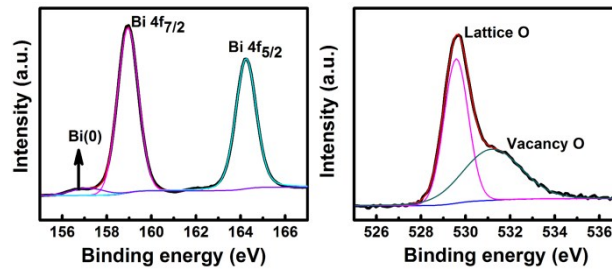

Fig. S2 Bi 4*f* and O 1*s* XPS spectra of the NBN:0.01Ho sample.

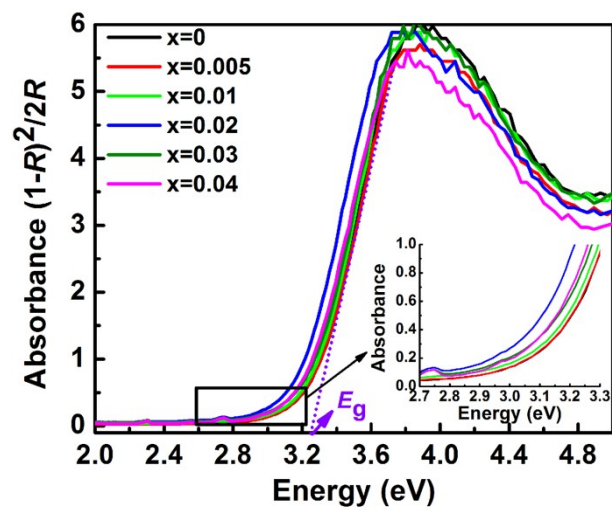

Fig. S3 Absorption spectra of NBN:xHo samples obtained by the conversion of the K-M function.

The inset shows the regionally enlarged drawing.

In Fig. S3, the absorbance data were obtained by a conversion of the reflectance data using a Kubelka-Munk function (K-M) as follows:

$$K / S = \frac{(1 - R)^2}{2R} \quad (1)$$

Here, the K and S are the absorption and scattering coefficients, respectively.  $R$  is the reflectance ratio. The band gap energies ( $E_g$ ) corresponding to the absorption edge can be obtained by extrapolating the absorption edge onto the energy axis.<sup>1</sup>

<sup>1</sup> B. K. Das, S. J. Bora, M. Chakraborty, L. Kalita, R. Chakrabarty and R. Barman, J. Chem. Sci. 2006, 118, 487.

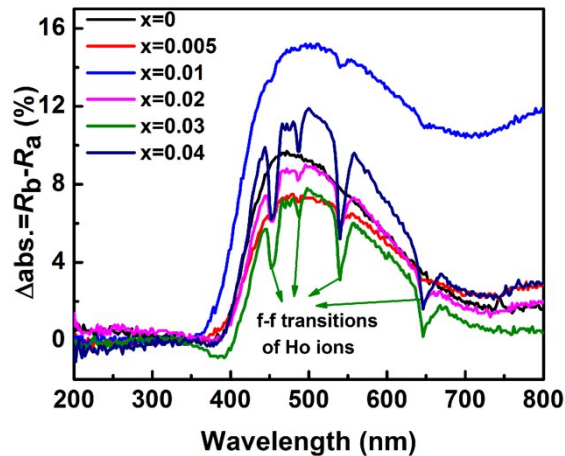

**Fig. S4** The difference ( $\Delta$ abs.) between reflectance ratios of NBN:xHo samples before and after 407 nm light irradiation (LD, 200 mW).

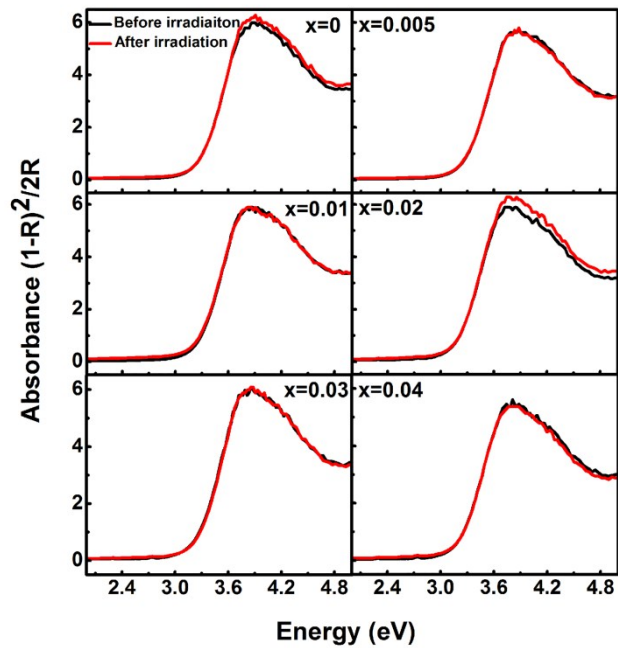

**Fig. S5** Absorption spectra of NBN:xHo samples before and after 407 nm light irradiation (LD, 200 mW).

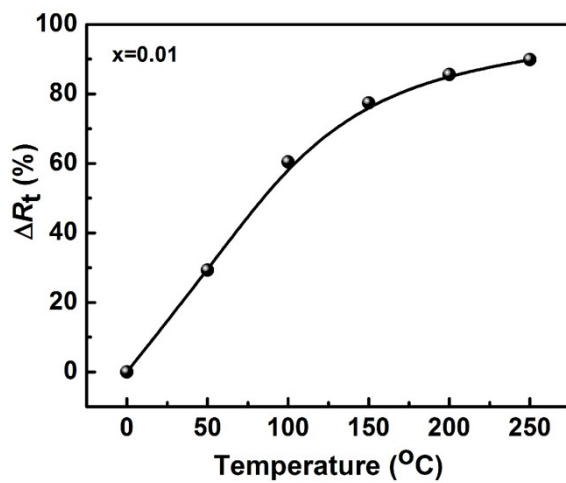

**Fig. S6** The  $\Delta R_t$  values of the NBN:0.01Ho sample as a function of the thermal treatment temperature.

**Table S1** Fitting results of Raman spectra (a) before and (b) after 407 nm light irradiation (LD,

200 mW) for all samples.

| (a)                           |                            |        |        |        |        |        |
|-------------------------------|----------------------------|--------|--------|--------|--------|--------|
| Modes<br>( $\text{cm}^{-1}$ ) | Samples before irradiation |        |        |        |        |        |
|                               | 0                          | 0.005  | 0.01   | 0.02   | 0.03   | 0.04   |
| $\nu_1$                       | 67.21                      | 67.52  | 67.18  | 67.27  | 67.87  | 66.70  |
| $\nu_2$                       | 81.22                      | 81.56  | 81.46  | 81.22  | 82.11  | 80.83  |
| $\nu_3$                       | 109.78                     | 110.40 | 109.79 | 109.95 | 110.45 | 106.86 |
| $\nu_4$                       | 144.77                     | 145.28 | 144.94 | 144.95 | 146.30 | 148.91 |
| $\nu_5$                       | 182.63                     | 181.73 | 182.90 | 181.17 | 184.15 | 184.55 |
| $\nu_6$                       | 221.08                     | 220.72 | 221.11 | 220.23 | 221.68 | 217.18 |
| $\nu_7$                       | 265.96                     | 266.84 | 266.20 | 266.31 | 268.09 | 263.00 |
| $\nu_8$                       | 328.46                     | 329.94 | 328.64 | 330.30 | 329.39 | 331.33 |
| $\nu_9$                       | 427.34                     | 426.06 | 429.52 | 426.67 | 428.98 | 428.31 |
| $\nu_{10}$                    | 574.01                     | 573.60 | 576.05 | 572.78 | 579.36 | 579.23 |
| $\nu_{11}$                    | 809.35                     | 811.48 | 810.53 | 808.77 | 808.64 | 807.10 |
| $\nu_{12}$                    | 840.95                     | 842.34 | 841.92 | 840.35 | 840.33 | 839.21 |

  

| (b)                           |                           |        |        |        |        |        |
|-------------------------------|---------------------------|--------|--------|--------|--------|--------|
| Modes<br>( $\text{cm}^{-1}$ ) | Samples after irradiation |        |        |        |        |        |
|                               | 0                         | 0.005  | 0.01   | 0.02   | 0.03   | 0.04   |
| $\nu_1$                       | 67.32                     | 67.36  | 67.36  | 67.43  | 67.72  | 66.84  |
| $\nu_2$                       | 81.20                     | 81.43  | 81.43  | 81.35  | 81.98  | 80.96  |
| $\nu_3$                       | 109.70                    | 109.26 | 109.26 | 110.06 | 110.69 | 107.06 |
| $\nu_4$                       | 144.85                    | 144.78 | 144.78 | 144.99 | 146.52 | 148.69 |
| $\nu_5$                       | 182.01                    | 183.10 | 183.10 | 180.94 | 183.61 | 184.26 |
| $\nu_6$                       | 220.38                    | 220.99 | 220.99 | 219.89 | 221.35 | 217.13 |
| $\nu_7$                       | 265.34                    | 265.53 | 265.53 | 266.25 | 268.61 | 263.24 |
| $\nu_8$                       | 328.50                    | 328.82 | 328.82 | 330.00 | 328.71 | 331.47 |
| $\nu_9$                       | 427.22                    | 429.08 | 429.08 | 425.82 | 429.20 | 428.30 |
| $\nu_{10}$                    | 574.19                    | 576.40 | 576.40 | 572.83 | 579.95 | 579.31 |
| $\nu_{11}$                    | 812.30                    | 808.66 | 807.45 | 806.93 | 809.14 | 808.27 |
| $\nu_{12}$                    | 842.95                    | 840.38 | 839.87 | 838.86 | 840.69 | 839.97 |

**Table S2** The band gap energies ( $E_g$  and  $E_g^*$ ) of NBN:xHo samples before and after 407 nm light irradiation (LD, 200 mW).

| Samples      | x=0  | x=0.005 | x=0.01 | x=0.02 | x=0.03 | x=0.04 |
|--------------|------|---------|--------|--------|--------|--------|
| $E_g$ (eV)   | 3.23 | 3.21    | 3.20   | 3.13   | 3.19   | 3.16   |
| $E_g^*$ (eV) | 3.24 | 3.22    | 3.19   | 3.12   | 3.18   | 3.17   |

 $E_g^*$  means the gap after irradiation
